# Supplementary material for: Generating digital drug cocktails via optical manipulation of drug-containing particles and photo-patterning of hydrogels
Source: Royal Society of Chemistry journal article supplement (doi:10.1039/c9lc00189a), 2019-01-01
Supplement: c9lc00189a1.pdf [file c9lc00189a1.pdf]

## Supplemental information

### Generating Digital Drug Cocktails via Optical Manipulation of Drug-containing Particles and Photo-Patterning of Hydrogels

Yi Yi-Sin Chen<sup>#1</sup>, Ko-Chin Chung<sup>#1</sup>, Wen-Yen Huang<sup>1</sup>, Wen-Bin Lee<sup>1</sup>, Chien-Yu Fu<sup>1</sup>, Chih-Hung Wang<sup>1</sup>, and Gwo-Bin Lee<sup>1, 2, 3\*</sup>

<sup>1</sup>*Department of Power Mechanical Engineering, National Tsing Hua University, Hsinchu 30013, Taiwan*

<sup>2</sup>*Institute of Biomedical Engineering, National Tsing Hua University, Hsinchu 30013, Taiwan*

<sup>3</sup>*Institute of NanoEngineering and Microsystems, National Tsing Hua University, Hsinchu 30013, Taiwan*

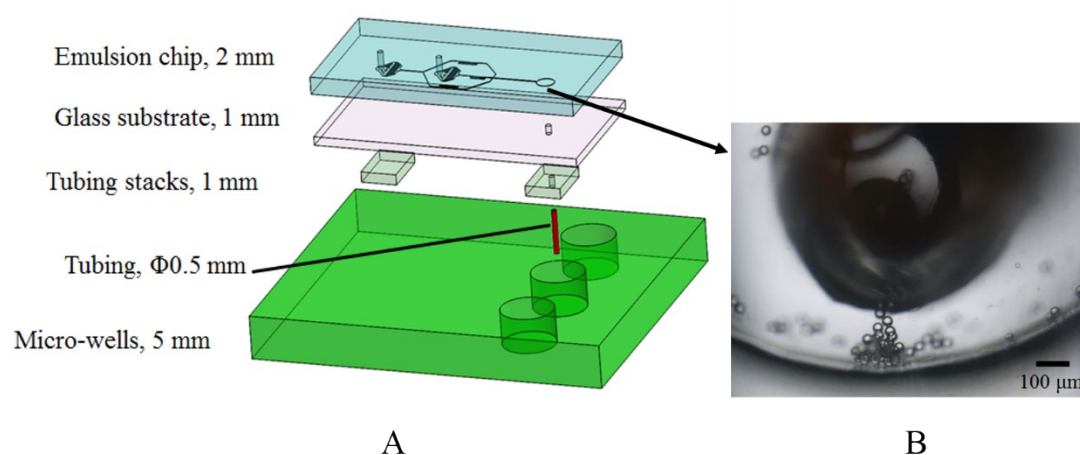

Supplementary figure 1. (A) Exploded view of an emulsion droplet chip and a micro-well chip. There was a micro-tube (red) connecting these two chips. (B) Drug-containing droplets were generated hydrodynamically, and 1 M of calcium chloride solution was injected into the micro-well for 30 min to solidify the drug-containing alginate particles.

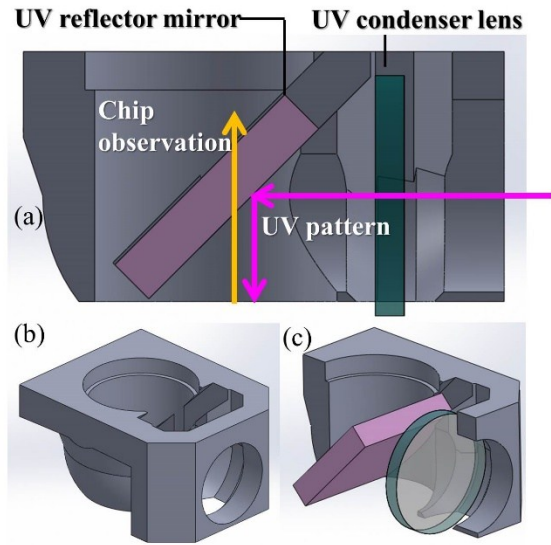

Supplementary figure 2. A beam splitting device composed of an UV reflector mirror was placed at an inclination angle of  $45^\circ$  while aligned with a 20x UV light condenser lens.

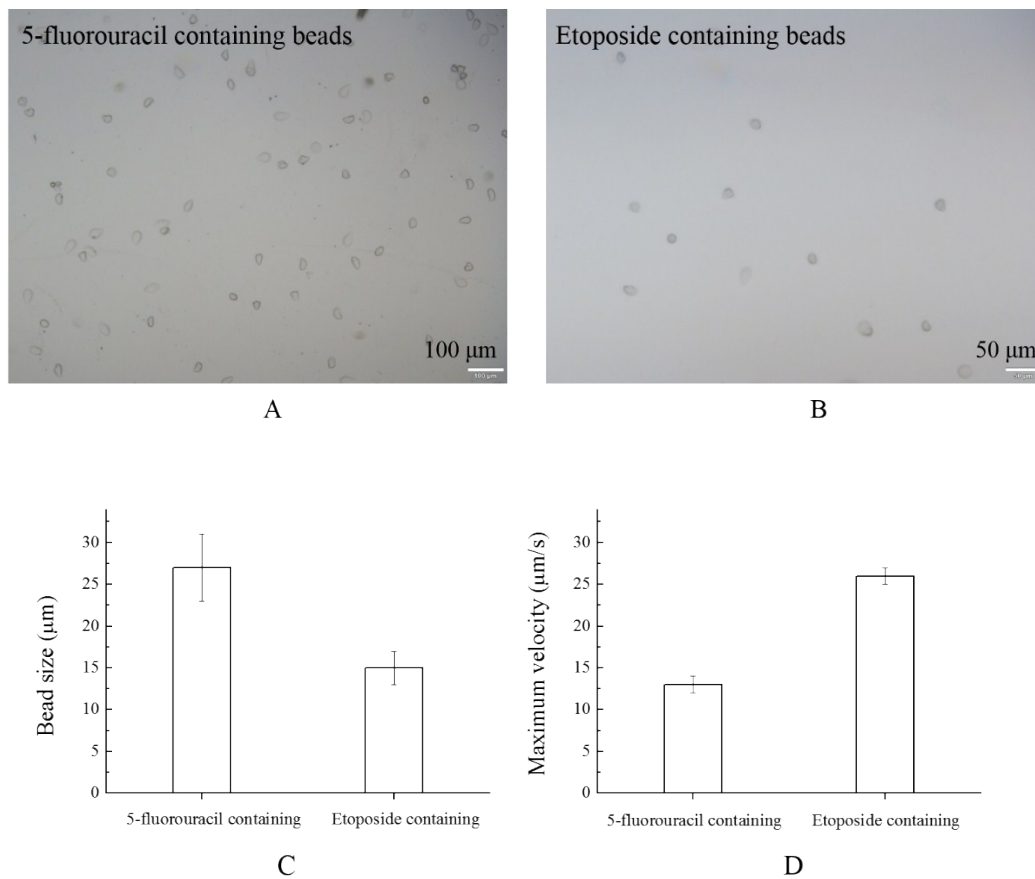

Supplementary figure 3. Solidified alginate particles containing 5-fluorouracil (A; diameter= $27 \pm 4 \mu\text{m}$ ) and etoposide (B; diameter= $15 \pm 2 \mu\text{m}$ ) ( $n=50$ ). (C-D) The corresponding maximum velocities while exposed to ODEP forces were measured to be  $13 \pm 1 \mu\text{m/s}$  and  $26 \pm 1 \mu\text{m/s}$ , respectively. Error bars represent standard deviation ( $n=10$ ).

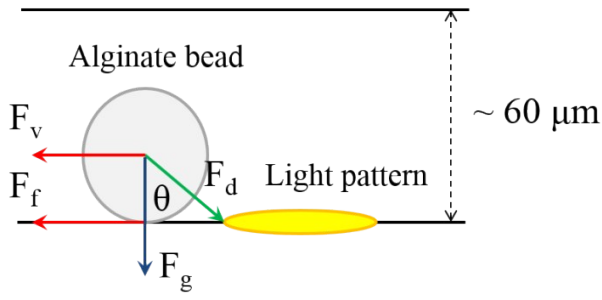

$$F_d \text{ (dielectrophoresis force)} = 2 \pi r^3 \epsilon_m R_e (f_{CM}) \nabla E^2$$

$$F_v \text{ (viscous force)} = 6\pi\eta\mu v$$

$$F_f \text{ (friction)} = \mu F_N = \mu (\cos(\theta) F_d + F_g)$$

$$F_g \text{ (gravity)} = 4 \pi r^3 \rho g / 3$$

Supplementary figure 4. The analysis of forces acting on the alginate particles. In a steady state, the horizontal component of the ODEP force was balanced by 1) a viscous force against the relative movement of a particle in the fluid and 2) friction, which was calculated from the net effect of gravity acting on the particle and the perpendicular component of the ODEP force.

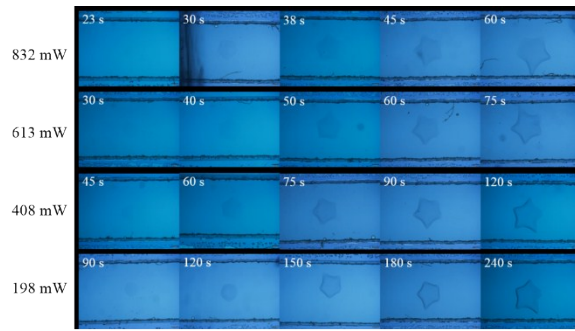

A

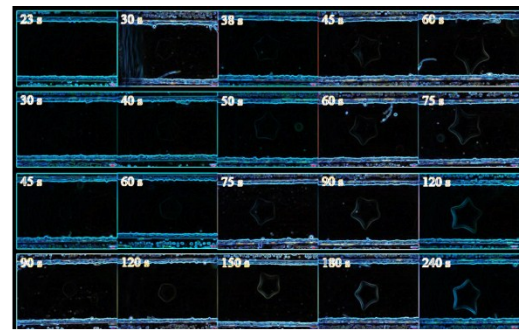

B

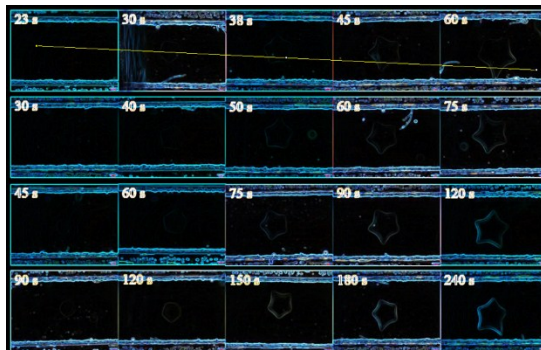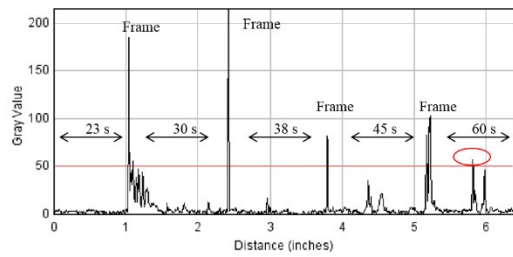

C

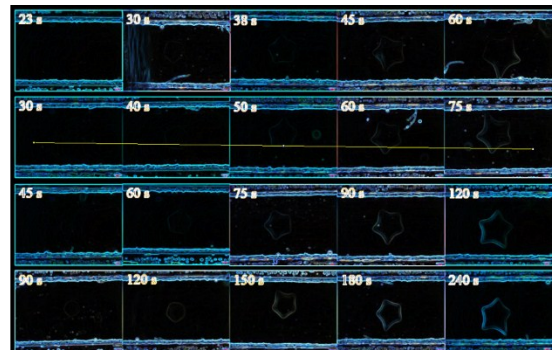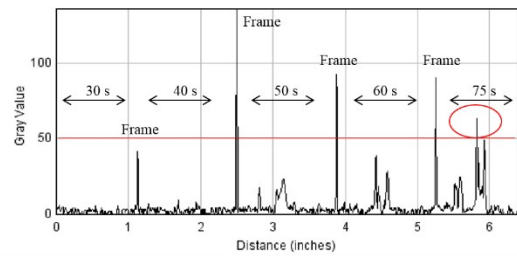

D

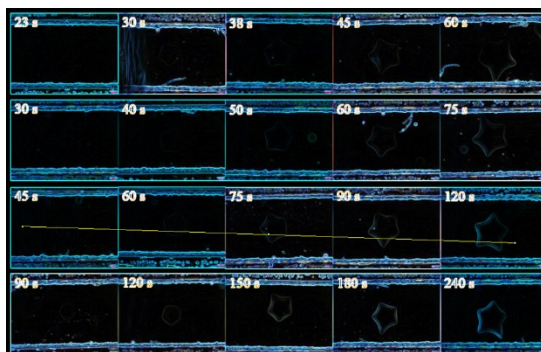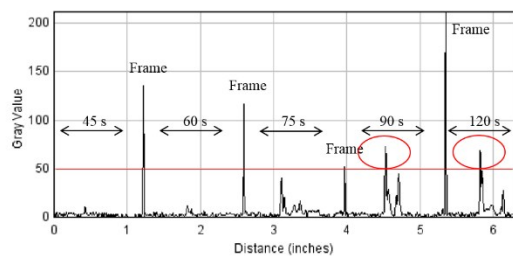

E

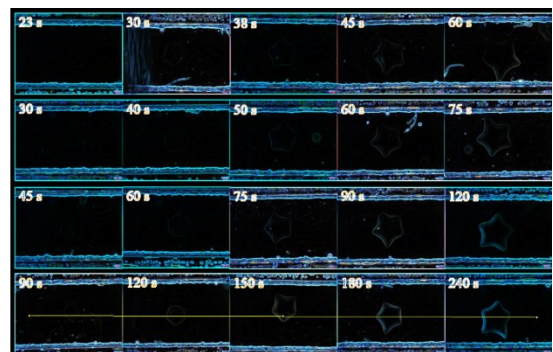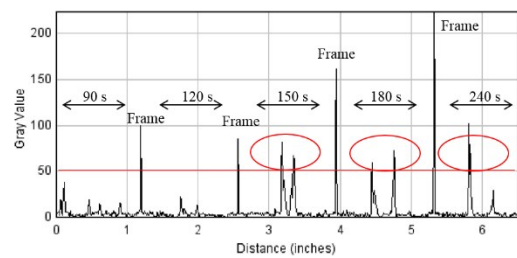

F

Supplementary figure 5. The image analysis by ImageJ to define the “clear pattern.” (A) Patterns in Figure 6 were presented for better image analysis. (B) A process function, “find edges” in ImageJ was used to identify the edges of UV light patterns. (C) A line across five images exposed at an UV light intensity of 832 mW was drawn and then another function, “plot profile” in ImageJ was used to display the intensities of pixels along the line. According to the plot profiles, the patterns with grey values of the edge higher than 50 were defined as “clear patterns.” (D-F) The same process was performed for images while exposed at UV light intensities of 613, 408, 198 mW, respectively.

Supplementary table 1. Four cases with exposure times of 60, 75, 90, and 150 s, respectively, were required to form clear patterns at light intensities of 832, 613, 408 and 198 mW, respectively.

|        |                    |        |       |       |       |        |
|--------|--------------------|--------|-------|-------|-------|--------|
| 832 mW | Exposure time (s)  | 23     | 30    | 38    | 45    | 60     |
|        | Gray value of edge | N/A    | 12.76 | 17.23 | 35.74 | 57.71  |
| 613 mW | Exposure time (s)  | 30     | 40    | 50    | 60    | 75     |
|        | Gray value of edge | N/A    | 9.63  | 23.47 | 39.32 | 63.33  |
| 408 mW | Exposure time (s)  | 45     | 60    | 75    | 90    | 120    |
|        | Gray value of edge | 10.823 | 12.14 | 41.06 | 73.56 | 68.88  |
| 198 mW | Exposure time (s)  | 90     | 120   | 150   | 180   | 240    |
|        | Gray value of edge | 19.3   | 22.75 | 82.27 | 73.23 | 101.74 |
